# Supplementary material for: Gas-phase formation of glycolonitrile in the interstellar medium
Source: Royal Society of Chemistry journal article supplement (doi:10.1039/d3cp02379f), 2023-01-01
Supplement: d3cp02379f1.pdf [file d3cp02379f1.pdf]

## Supporting Information for:

# Gas-Phase Formation of Glycolonitrile in the Interstellar Medium

Luis Guerrero-Méndez,<sup>a</sup> Anxo Lema-Saavedra,<sup>b</sup> Elena Jiménez,<sup>c,d</sup> Antonio Fernández-Ramos,<sup>\*a,b</sup> and Emilio Martínez-Núñez<sup>\*a</sup>

<sup>a</sup>Departamento de Química Física, Facultade de Química, Universidade de Santiago de Compostela, Avda. das Ciencias s/n 15782, Santiago de Compostela, Spain. E-mail: [gf.ramos@usc.es](mailto:gf.ramos@usc.es), [emilio.nunez@usc.es](mailto:emilio.nunez@usc.es)

<sup>b</sup>Centro Singular de Investigación en Química Biológica y Materiales Moleculares (CIQUS), Universidade de Santiago de Compostela, C/Jenaro de la Fuente s/n, 15782, Santiago de Compostela, Spain

<sup>c</sup>Departamento de Química Física, Facultad de Ciencias y Tecnologías Químicas, Universidad de Castilla-La Mancha, Avda. Camilo José Cela 1b, 13071, Ciudad Real, Spain

<sup>d</sup>Instituto de Investigación en Combustión y Contaminación Atmosférica (ICCA), Universidad de Castilla-La Mancha, Camino de Moledores s/n, 13071, Ciudad Real, Spain

|                                                                                      |    |
|--------------------------------------------------------------------------------------|----|
| <b>Fig. S1</b> Product abundances as a function of number of iterations.....         | S3 |
| <b>Fig. S2</b> Additional CN+ CH <sub>2</sub> OH pathways .....                      | S4 |
| <b>Fig. S3</b> Additional OH + CH <sub>2</sub> NC pathway.....                       | S5 |
| <b>Fig. S4</b> Additional 3-step HCO + CH <sub>2</sub> N pathways.....               | S6 |
| <b>Fig. S5</b> Additional longer HCO + CH <sub>2</sub> N pathways.....               | S7 |
| <b>Fig. S6</b> Additional radical-molecule pathway.....                              | S8 |
| <b>Table S1</b>                                                                      |    |
| Rate coefficients for the OH+CH <sub>2</sub> CN→HNC+CH <sub>2</sub> O reaction ..... | S9 |
| <b>Table S2</b>                                                                      |    |
| Rate coefficients for the OH+CH <sub>2</sub> CNH→GLN+H reaction .....                | S9 |

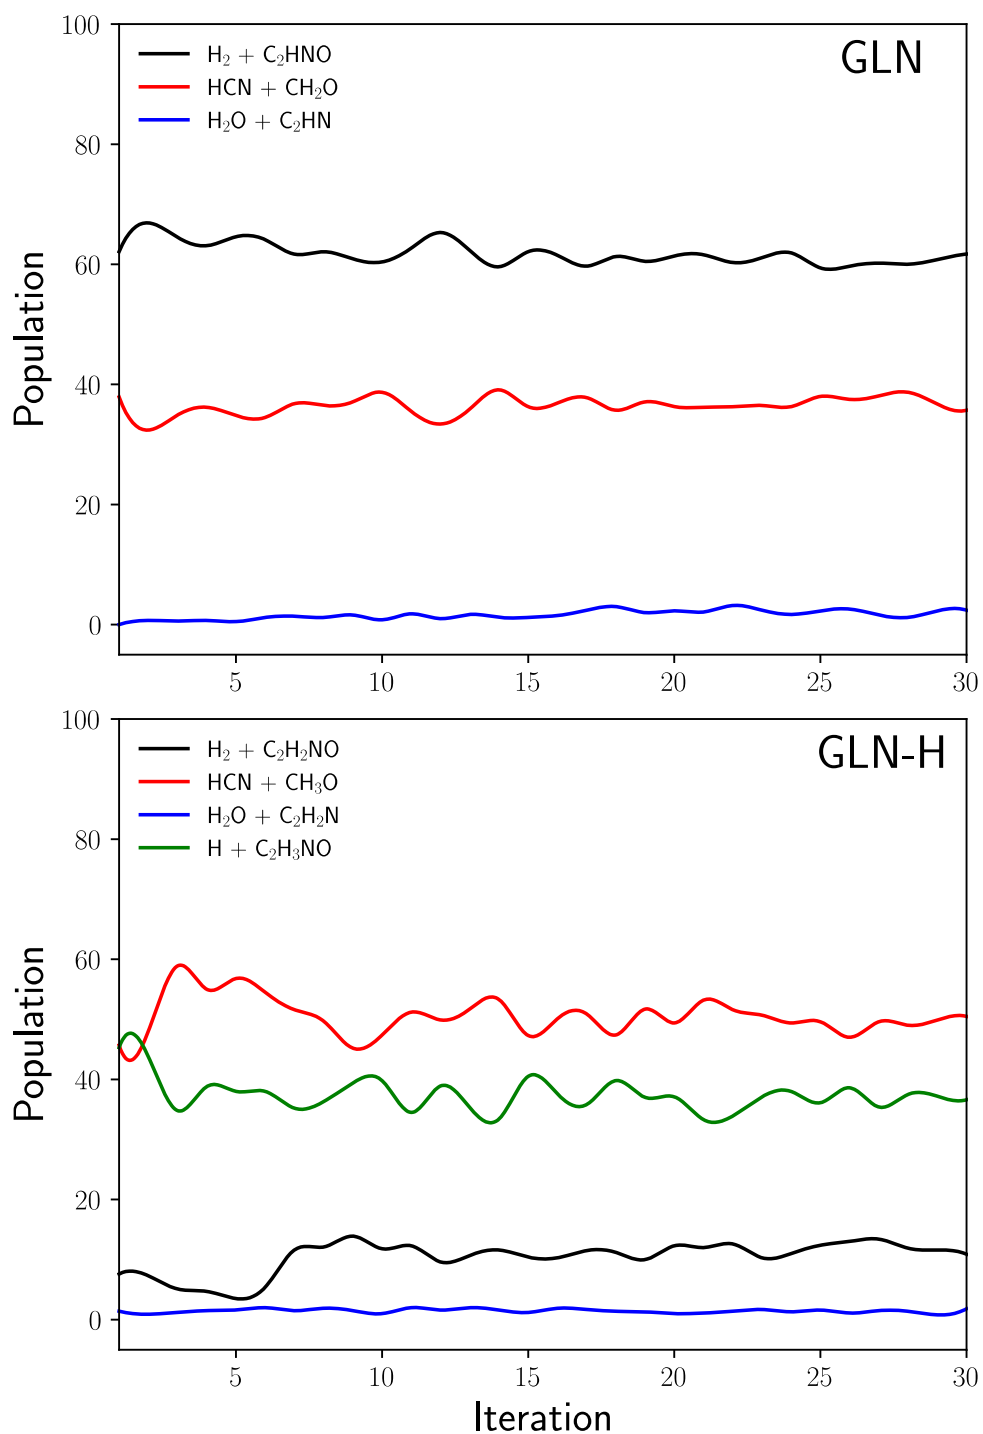

**Fig. S1** Product abundances as a function of number of iterations obtained from the KMC simulations for GLN and GLN-H, using an excitation energy of 250 kcal/mol. The Level1-calculated energies and vibrational frequencies are employed in the calculations of the RRKM rate coefficients, and barrierless reactions are not included.

The relative energies depicted in Figures S2-S6 are referenced to the initial geometry utilized for the AutoMeKin calculations of the GLN and GLN-H systems.

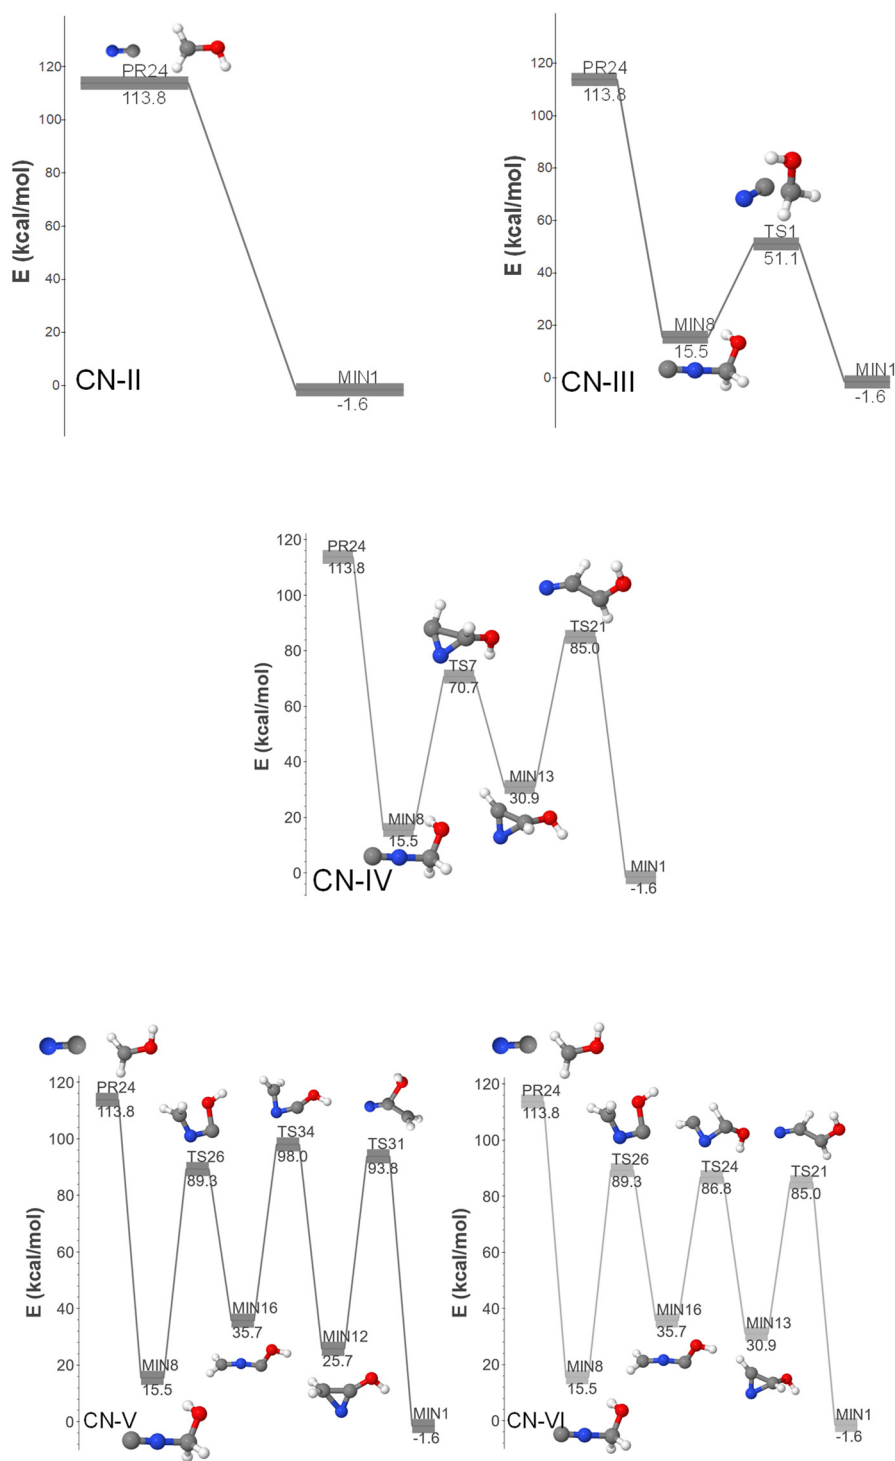

**Fig. S2** Additional DFT-computed energy profiles for the barrierless formation of GLN from CN+CH<sub>2</sub>OH.

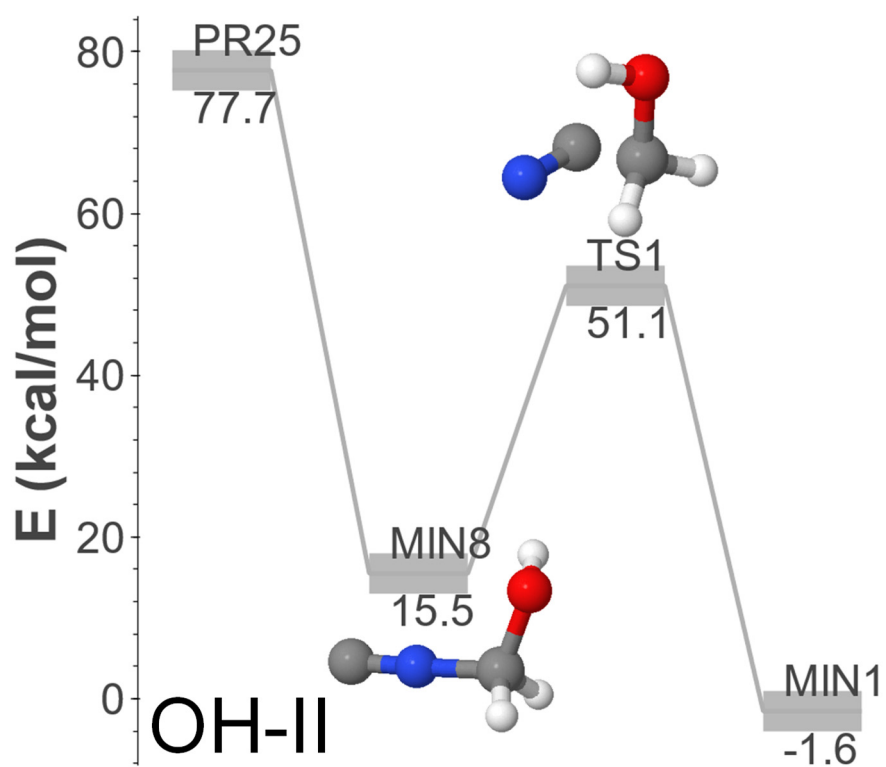

**Fig. S3** Additional DFT-computed energy profile for the barrierless formation of GLN from OH + CH<sub>2</sub>NC (OH-II pathway).

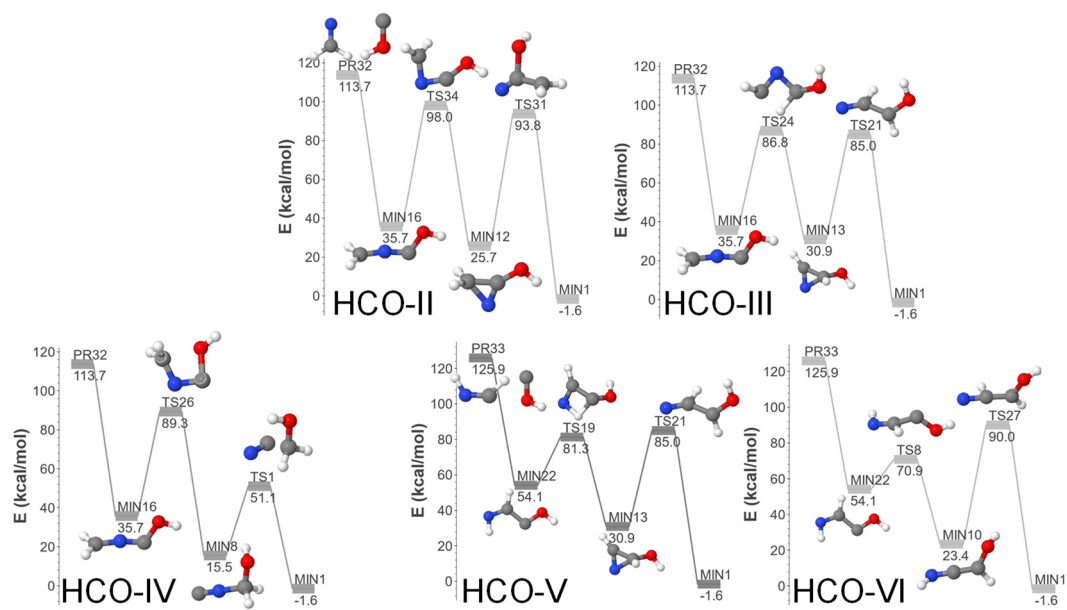

**Fig. S4** Additional DFT-computed energy profiles for the barrierless formation of GLN from HCO + CH<sub>2</sub>N. Pathways involving 3 elementary steps are displayed.

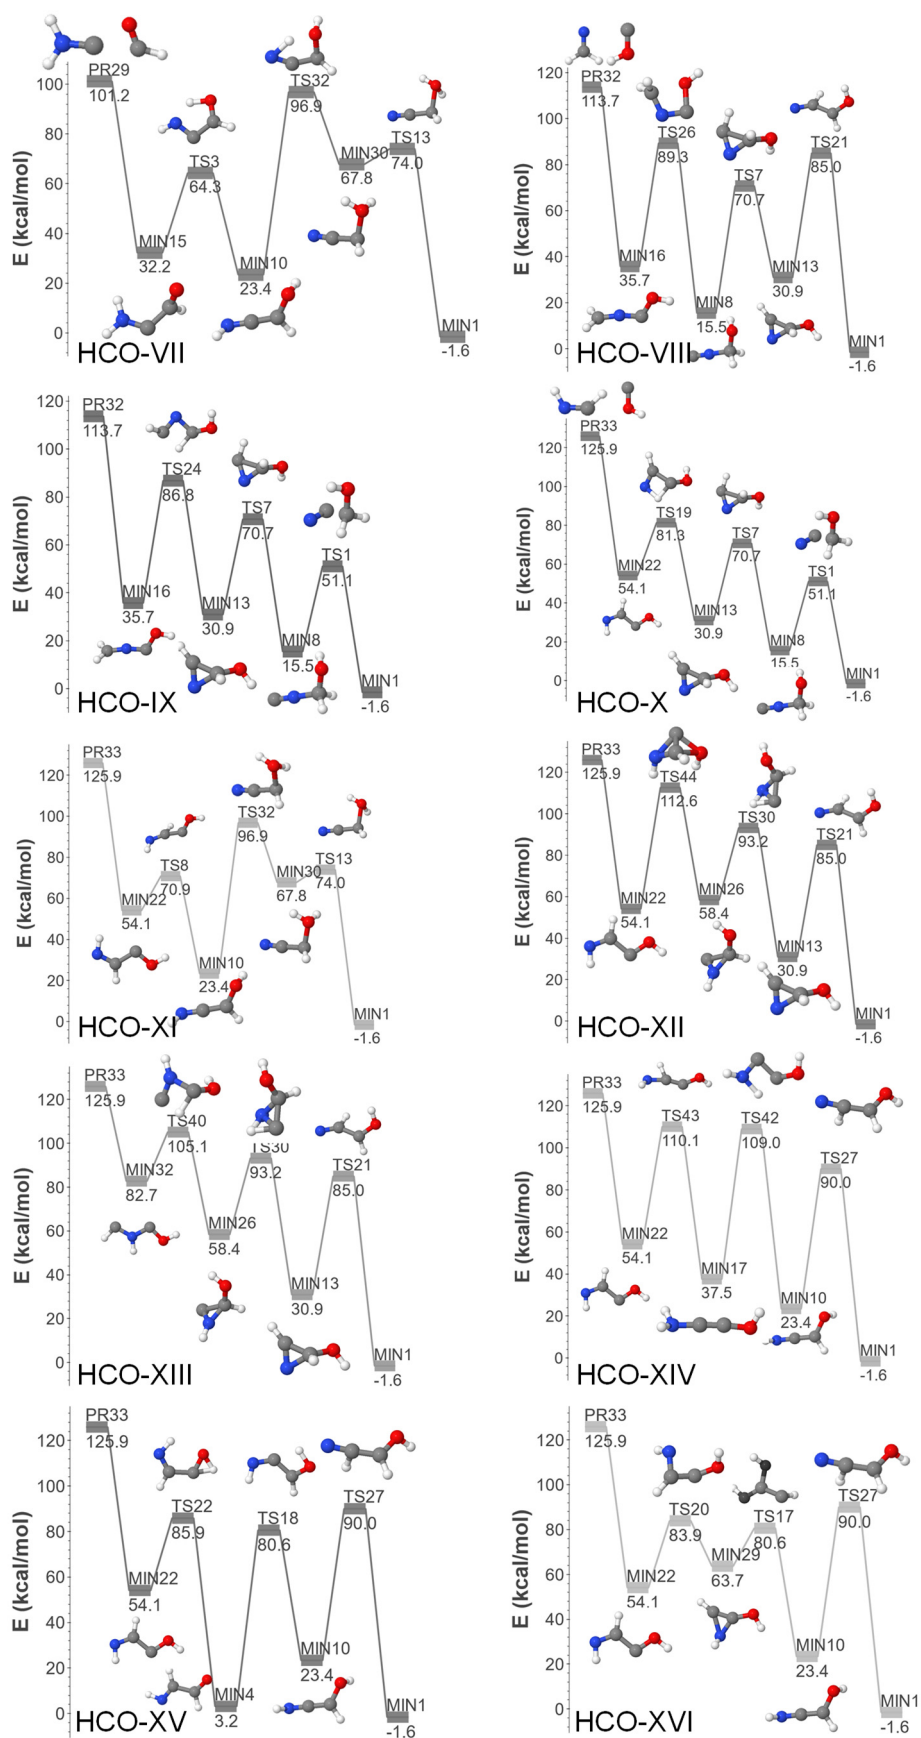

**Fig. S5** Additional DFT-computed energy profiles for the barrierless formation of GLN from HCO + CH<sub>2</sub>N. Pathways involving 4 elementary steps are displayed.

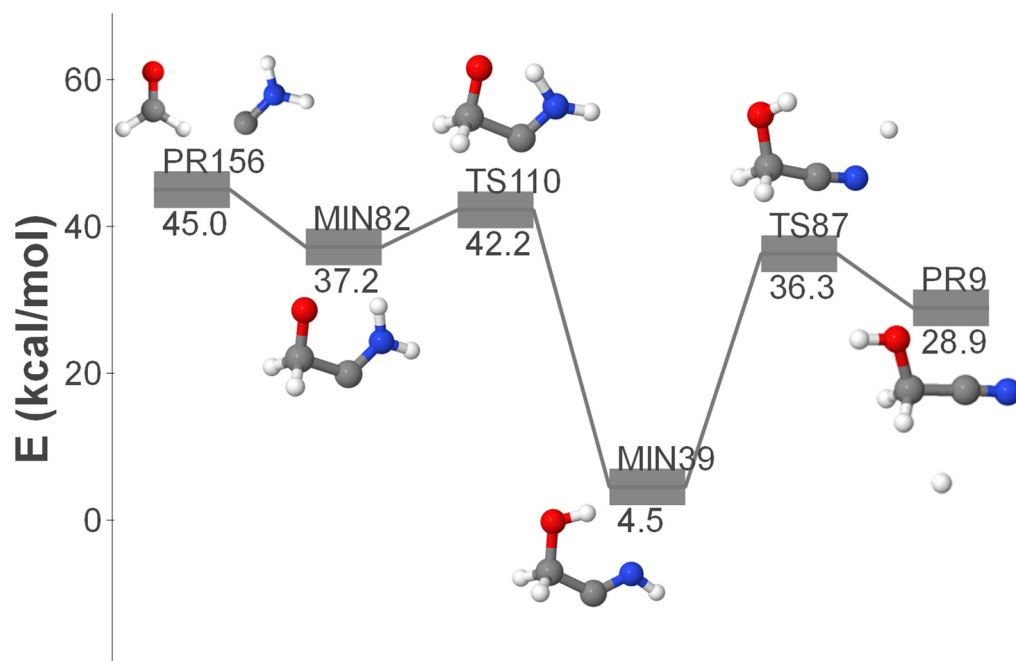

**Fig. S6** Additional DFT-computed energy profile for the barrierless (radical-molecule) formation of GLN+H.



**Table S1:** Rate coefficients (in  $\text{cm}^3 \text{ molecule}^{-1} \text{ s}^{-1}$ ) for the  $\text{OH}+\text{CH}_2\text{CN}\rightarrow\text{HNC}+\text{CH}_2\text{O}$  reaction

| $T/\text{K}$ | $k_1$    | $k_2$     | $k^{\text{CUS}}$ |
|--------------|----------|-----------|------------------|
| 10           | 1.15E-09 | 2.90E+243 | 1.15E-09         |
| 20           | 1.02E-09 | 5.57E+115 | 1.02E-09         |
| 30           | 9.55E-10 | 1.15E+73  | 9.55E-10         |
| 40           | 9.11E-10 | 4.60E+51  | 9.11E-10         |
| 50           | 8.78E-10 | 6.19E+38  | 8.78E-10         |
| 60           | 8.51E-10 | 1.56E+30  | 8.51E-10         |
| 70           | 8.30E-10 | 1.09E+24  | 8.30E-10         |
| 80           | 8.11E-10 | 2.58E+19  | 8.11E-10         |
| 90           | 7.96E-10 | 6.45E+15  | 7.96E-10         |
| 100          | 7.82E-10 | 8.39E+12  | 7.82E-10         |
| 110          | 7.69E-10 | 3.64E+10  | 7.69E-10         |
| 120          | 7.58E-10 | 3.89E+08  | 7.58E-10         |
| 130          | 7.48E-10 | 8.34E+06  | 7.48E-10         |
| 140          | 7.39E-10 | 3.09E+05  | 7.39E-10         |
| 150          | 7.31E-10 | 1.77E+04  | 7.31E-10         |

**Table S2:** Rate coefficients (in  $\text{cm}^3 \text{ molecule}^{-1} \text{ s}^{-1}$ ) for the  $\text{OH}+\text{CH}_2\text{CNH}\rightarrow\text{GLN}+\text{H}$  reaction

| $T/\text{K}$ | $k_1$    | $k_2$    | $k^{\text{CUS}}$ |
|--------------|----------|----------|------------------|
| 10           | 6.61E-10 | 5.79E+16 | 6.61E-10         |
| 20           | 5.89E-10 | 3.16E+02 | 5.89E-10         |
| 30           | 5.51E-10 | 4.29E-03 | 5.51E-10         |
| 40           | 5.25E-10 | 1.40E-05 | 5.25E-10         |
| 50           | 5.06E-10 | 4.26E-07 | 5.05E-10         |
| 60           | 4.91E-10 | 4.01E-08 | 4.85E-10         |
| 70           | 4.78E-10 | 7.31E-09 | 4.49E-10         |
| 80           | 4.68E-10 | 2.02E-09 | 3.80E-10         |
| 90           | 4.59E-10 | 7.41E-10 | 2.83E-10         |
| 100          | 4.51E-10 | 3.32E-10 | 1.91E-10         |
| 110          | 4.43E-10 | 1.73E-10 | 1.24E-10         |
| 120          | 4.37E-10 | 1.00E-10 | 8.15E-11         |
| 130          | 4.31E-10 | 6.35E-11 | 5.53E-11         |
| 140          | 4.26E-10 | 4.30E-11 | 3.91E-11         |
| 150          | 4.21E-10 | 3.09E-11 | 2.88E-11         |
